# Supplementary material for: Regulation and Novel Action of Thymidine Phosphorylase in Non-Small Cell Lung Cancer: Crosstalk with Nrf2 and HO-1
Source: PLOS journal article supplement (doi:10.1371/journal.pone.0097070), 2014-05-12
Supplement: S3 (10.1371/journal.pone.0097070.s003) [file journal.pone.0097070.s003]

**Figure S3**

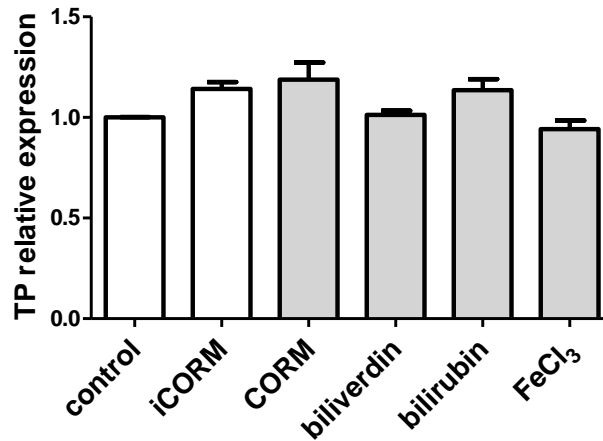

**Figure S3. Effect of HO-1 products on TP expression.** CORM-2 [CORM, CO-releasing molecule - tricarbonyldichlororuthenium(II) dimer], bilirubin and DMSO (used as solvent) were purchased from Sigma Aldrich. Inactive CORM (iCORM) was prepared by overnight evaporation of CORM stock solution. Biliverdin was from MP Bioscience, FeCl<sub>3</sub> was from POCh. NCI-EV cells were stimulated with 10  $\mu$ M CORM, iCORM, biliverdin, bilirubin or FeCl<sub>3</sub> for 24 h (n=3).
