# Supplementary material for: Regulation and Novel Action of Thymidine Phosphorylase in Non-Small Cell Lung Cancer: Crosstalk with Nrf2 and HO-1
Source: PLOS journal article supplement (doi:10.1371/journal.pone.0097070), 2014-05-12
Supplement: S7 (10.1371/journal.pone.0097070.s007) [file journal.pone.0097070.s007]

**Figure S7**

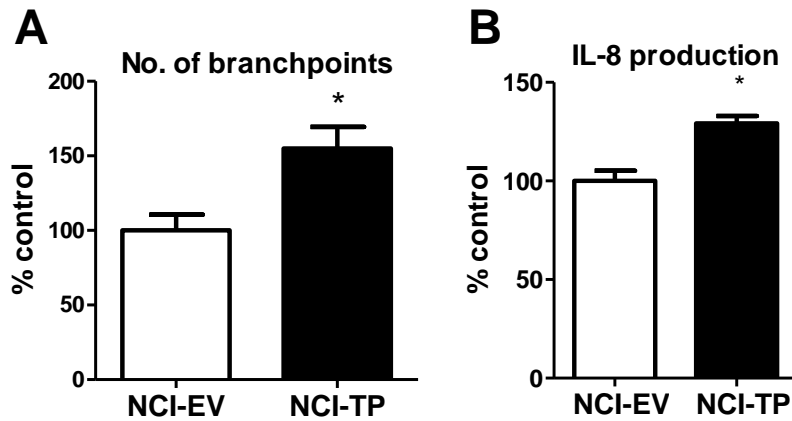

**Figure S7. Effect of TP overexpression on angiogenic potential of NCI-H292 cells *in vitro*.** **A.** NCI-H292 cells were stimulated with 1 mM Thd for 48 h in normoxia and conditioned media were applied on HMEC-1 cells seeded on Matrigel. The number of branchpoints formed by HMEC-1 treated with conditioned media from either empty-vector transduced NCI-H292 cells (NCI-EV) or TP-transduced (NCI-TP) has been calculated. **B.** Increased production of IL-8 in TP-overexpressing NCI-H292 cells stimulated with 1 mM Thd for 24 h (n=4). \*  $p < 0.05$  NCI-TP vs NCI-EV.
